# Supplementary material for: The Molecular Phenotype of Kidney Transplants: Insights From the MMDx Project
Source: PubMed Central journal article supplement — Transplantation. 2023 Dec 13;108(1):45–71. doi: 10.1097/TP.0000000000004624 (PMC10718223; doi:10.1097/tp.0000000000004624), 2023-12-13
Supplement: tpa-108-045-s001.pdf [file tpa-108-045-s001.pdf]

**The molecular phenotype of kidney transplants:  
Insights from the MMDx project**

Philip F. Halloran, MD, PhD<sup>1</sup>, Katelynn S. Madill-Thomsen, PhD<sup>1</sup> and Jeff Reeve PhD<sup>1</sup>

<sup>1</sup>University of Alberta, Edmonton, AB, Canada

SUPPLEMENTAL DIGITAL CONTENT

## Table of Contents

|                                                                                          |   |
|------------------------------------------------------------------------------------------|---|
| <b>Table S1.</b> List of abbreviations and their definitions used in the manuscript..... | 3 |
| <b>Table S2.</b> Participating Centers in INTERCOMEX and Trifecta-Kidney .....           | 5 |

| <b>Table S1.</b> List of abbreviations and their definitions used in the manuscript |                                                                                                                                 |
|-------------------------------------------------------------------------------------|---------------------------------------------------------------------------------------------------------------------------------|
| <b>Abbreviation</b>                                                                 | <b>Definition</b>                                                                                                               |
| AA                                                                                  | Archetypal analysis                                                                                                             |
| AMR                                                                                 | Antibody-mediated rejection                                                                                                     |
| ADCC                                                                                | Antibody-dependent cell-mediated cytotoxicity                                                                                   |
| AKI                                                                                 | Acute kidney injury                                                                                                             |
| AKI1                                                                                | AA Group: Acute kidney injury 1                                                                                                 |
| AKI2                                                                                | AA Group: Acute kidney injury 2                                                                                                 |
| AMR <sub>Prob</sub>                                                                 | AMR classifier (AMR, [C4d-negative and C4d-positive] vs. everything else)                                                       |
| AMR-RAT                                                                             | AMR – rejection-associated transcripts                                                                                          |
| AMAT                                                                                | Alternative macrophage activation transcripts                                                                                   |
| BAT                                                                                 | B cell-associated transcripts                                                                                                   |
| PVN                                                                                 | Polyoma virus nephropathy                                                                                                       |
| CAT                                                                                 | Cytotoxic T cell-associated transcripts                                                                                         |
| C4d                                                                                 | Complement factor d                                                                                                             |
| cg>0 <sub>Prob</sub>                                                                | Glomerular double contours probability classifier                                                                               |
| CKD                                                                                 | Chronic kidney disease                                                                                                          |
| CNI                                                                                 | Calcineurin inhibitor                                                                                                           |
| dd-cfDNA                                                                            | Donor-derived cell-free DNA                                                                                                     |
| DEKAF                                                                               | Deterioration of kidney allograft function                                                                                      |
| DSA                                                                                 | Donor-specific HLA antibody                                                                                                     |
| DSA <sub>Prob</sub>                                                                 | DSA Probability classifier                                                                                                      |
| DSASTs                                                                              | DSA-specific transcripts                                                                                                        |
| EAMR                                                                                | Early-stage AMR                                                                                                                 |
| eGFR                                                                                | Estimated glomerular filtration rate                                                                                            |
| FAMR                                                                                | Fully-developed AMR                                                                                                             |
| g>1 <sub>Prob</sub>                                                                 | Glomerulitis classifier                                                                                                         |
| GFR                                                                                 | Glomerular filtration rate                                                                                                      |
| GRITs                                                                               | Interferon gamma-inducible transcripts                                                                                          |
| HLA                                                                                 | Human leukocyte antigen                                                                                                         |
| i>1 <sub>Prob</sub>                                                                 | Interstitial infiltrate classifier                                                                                              |
| IFNG                                                                                | Interferon gamma                                                                                                                |
| IgG                                                                                 | Immunoglobulin G                                                                                                                |
| IGT                                                                                 | Immunoglobulin transcripts                                                                                                      |
| IFTA                                                                                | Interstitial fibrosis and tubular atrophy                                                                                       |
| i-IFTA                                                                              | Interstitial fibrosis and tubular atrophy in areas of inflammation                                                              |
| INTERCOMEX                                                                          | Diagnostic and Therapeutic Applications of Microarrays in Organ Transplantation<br>(ClinicalTrials.gov Identifier: NCT01299168) |
| IRRATs                                                                              | Injury-repair response-associated transcripts                                                                                   |
| IRIT                                                                                | Injury-repair induced transcripts                                                                                               |
| IRITD3                                                                              | Injury-repair induced transcripts – day 3                                                                                       |
| IRITD5                                                                              | Injury-repair induced transcripts – day 5                                                                                       |
| ITAM                                                                                | Immunoreceptor tyrosine-based activation motif                                                                                  |
| EABMR                                                                               | Early-stage mABMR                                                                                                               |
| FABMR                                                                               | Fully-developed mABMR                                                                                                           |
| FDR                                                                                 | False discovery rate                                                                                                            |
| FICOL                                                                               | Fibrillar collagen transcripts                                                                                                  |
| KT                                                                                  | Kidney transcripts                                                                                                              |
| KT1                                                                                 | Kidney transcripts – set 1                                                                                                      |
| KT2                                                                                 | Kidney transcripts – set 2                                                                                                      |
| LAMR                                                                                | Late-stage mAMR                                                                                                                 |
| lowGFR <sub>Prob</sub>                                                              | Low GFR probability classifier                                                                                                  |

|                       |                                                     |
|-----------------------|-----------------------------------------------------|
| MCATs                 | Mast cell transcripts                               |
| MHC                   | Major histocompatibility complex                    |
| MMDx                  | Molecular Microscope <sup>®</sup> Diagnostic System |
| mRNA                  | Messenger RNA                                       |
| NFAT                  | Nuclear factor of activated T cells                 |
| NK                    | Natural killer                                      |
| NKB                   | NK cell burden transcripts                          |
| NR                    | No rejection                                        |
| PC1                   | Principal component 1                               |
| PC2                   | Principal component 2                               |
| PC3                   | Principal component 3                               |
| PC                    | Principal component                                 |
| PCA                   | Principal component analysis                        |
| PRA                   | Panel reactive antibody                             |
| Prot <sub>Prob</sub>  | Proteinuria probability classifier                  |
| ptc>1 <sub>Prob</sub> | Peritubular capillaritis classifier                 |
| PBT                   | Pathogenesis-based transcript set                   |
| QCATs                 | Cytotoxic T cell-associated transcripts             |
| QCMAT                 | Constitutive macrophage-associated transcripts      |
| RATs                  | Rejection-associated transcripts                    |
| RNA                   | Ribonucleic acid                                    |
| RTPCR                 | Real-time polymerase chain reaction                 |
| t>1 <sub>Prob</sub>   | Tubulitis classifier                                |
| TCMR                  | T cell-mediated rejection                           |
| TCMR1                 | AA Group: T cell-mediated rejection 1               |
| TCMR2                 | AA Group: T cell-mediated rejection 2               |
| TCMR <sub>Prob</sub>  | TCMR classifier (TCMR vs. everything else)          |
| TG                    | Transplant glomerulopathy                           |
| TNF                   | Tumor necrosis factor                               |
| TxBx                  | Time of biopsy posttransplant                       |

**Table S2.** Participating Centers in INTERCOMEX and Trifecta-Kidney

| <b>INTERCOMEX</b>                              |                      |                                                               |
|------------------------------------------------|----------------------|---------------------------------------------------------------|
| <b>Center</b>                                  | <b>Location</b>      | <b>Principal investigators</b>                                |
| University of Alabama at Birmingham            | Birmingham, AL, USA  | Roslyn Mannon                                                 |
| Val d'Hebron University Hospital               | Barcelona, Spain     | Daniel Serón and Joana Sellarés                               |
| Montefiore Medical Center                      | Bronx, NY, USA       | Enver Akalin                                                  |
| Manchester Royal Infirmary                     | Manchester, UK       | Declan de Freitas and Michael Picton                          |
| University of Maryland                         | Baltimore, MD, USA   | Jonathan Bromberg and Matt Weir                               |
| Charite-Medical University of Berlin           | Berlin, Germany      | Klemens Budde and Timm Heinbokel                              |
| Medical University of Hannover                 | Hannover, Germany    | Gunilla Einecke                                               |
| PinnacleHealth Transplant Associates           | Harrisburg, PA, USA  | Harold Yang and Seth Narins                                   |
| Henry Ford Hospital                            | Detroit, MI, USA     | Milagros Samaniego-Picota                                     |
| Necker Hospital & St. Louis Hospital           | Paris, France        | Carmen Lefaucheur, Alexandre Loupy                            |
| Pomeranian Medical University                  | Poland               | Marek Myslak and Agnieszka Perkowska-Ptasinska                |
| Methodist Transplant and Specialty Hospital    | San Antonio, TX, USA | Adam Bingaman                                                 |
| Washington University at St. Louis             | St Louis, MO, USA    | Daniel Brennan and Andrew Malone                              |
| Hennepin County Medical Centre                 | Minneapolis, MN, USA | Bertram Kasiske                                               |
| University of Alberta                          | Edmonton, AB, CA     | Philip F Halloran                                             |
| University on Minnesota                        | Minneapolis, MN, USA | Arthur Matas                                                  |
| University of Wisconsin                        | Madison, WI, USA     | Arjang Djamali                                                |
| Medical University of Vienna                   | Vienna, Austria      | Georg Böhmig and Farsad Eskandary                             |
| Virginia Commonwealth University               | Richmond, VA, USA    | Gaurav Gupta                                                  |
| <b>Trifecta-Kidney</b>                         |                      |                                                               |
| <b>Center</b>                                  | <b>Location</b>      | <b>Principal investigators</b>                                |
| Medical University in Białystok                | Białystok, Poland    | Beata Naumnik, Justyna Fryc                                   |
| University of Maryland School of Medicine      | Baltimore, MD, USA   | Jonathan Bromberg, Matt Weir, Nadiesda Costa                  |
| Johns Hopkins University School of Medicine    | Baltimore, MD, USA   | Daniel Brennan, Sam Kant, Vignesh Viswanathan, Ashish Solanki |
| Charite-Medical University of Berlin           | Berlin, Germany      | Klemens Budde                                                 |
| University Hospitals: Cleveland Medical Center | Cleveland, OH, USA   | Jittirat Arksarapuk                                           |
| The Cleveland Clinic                           |                      | Emilio Poggio, Richard Fatica, Ziad Zaky                      |
| The Children's Memorial Health Institute       | Warsaw, Poland       | Ryszard Grenda                                                |
| Henry Ford Transplant Institute                | Detroit, MI, USA     | Milagros Samaniego-Picota, Iman Francis, Anita Patel          |
| Medical University of Gdańsk                   | Gdańsk, Poland       | Alicja Dębska-Ślizień, Joanna Konopa, Andrzej Chamienia       |
| Medical University of Silesia                  | Katowice, Poland     | Andrzej Więcek, Grzegorz Piecha                               |
| University of Ljubljana                        | Ljubljana, Slovenia  | Željka Veceric-Haler, Miha Arnol, Nika Kojc                   |
| Wojewodzki Hospital                            | Poznan, Poland       | Maciej Glyda, Katarzyna Smykal-Jankowiak                      |

|                                                                            |                                |                                                                                                             |
|----------------------------------------------------------------------------|--------------------------------|-------------------------------------------------------------------------------------------------------------|
| <b>Institute for Clinical and Experimental Medicine (IKEM)</b>             | <b>Prague, Czech Republic</b>  | Ondrej Viklicky, Petra Hrubá, Silvie Rajnochová Bloudíčková, Janka Slatinská                                |
| <b>Centre of Nephrology, Vilnius University Hospital Santaros Klinikos</b> | <b>Vilnius, Lithuania</b>      | Marius Miglinas                                                                                             |
| <b>Pomeranian Medical University</b>                                       | <b>Szczecin, Poland</b>        | Marek Myślak, Joanna Mazurkiewicz, Marta Gryczman                                                           |
| <b>University Hospital n.2, Szczecin</b>                                   |                                | Leszek Domański                                                                                             |
| <b>Tampa General Hospital</b>                                              | <b>Tampa Bay, FL, USA</b>      | Mahmoud Kamel                                                                                               |
| <b>Warsaw Medical University</b>                                           | <b>Warsaw, Poland</b>          | Agnieszka Perkowska-Ptasińska, Dominika Dęborska-Materkowska, Michał Cizek, Magdalena Durlik, Leszek Pączek |
| <b>Medical University of Wrocław</b>                                       | <b>Wrocław, Poland</b>         | Mirosław Banasik                                                                                            |
| <b>University Hospital Merkur</b>                                          | <b>Zagreb, Croatia</b>         | Ksenija Vucur, Zeljka Jurekovic                                                                             |
| <b>University Hospital Zurich</b>                                          | <b>Zurich, Switzerland</b>     | Thomas Müller, Thomas Schachtner                                                                            |
| <b>Washington University at St. Louis</b>                                  | <b>St. Louis, MO, USA</b>      | Andrew Malone, Tarek Alhamad                                                                                |
| <b>The Royal Melbourne Hospital</b>                                        | <b>Melbourne, Australia</b>    | Kevin Chow, Peter Hughes                                                                                    |
| <b>Intermountain Healthcare</b>                                            | <b>Salt Lake City, UT, USA</b> | Sanjiv Anand                                                                                                |
| <b>Virginia Commonwealth University</b>                                    | <b>Richmond, VA, USA</b>       | Gaurav Gupta, Layla Kamal, Dhiren Kumar, Irfan Moinuddin, Sindhura Bobba                                    |
| <b>University of Alberta</b>                                               | <b>Edmonton, AB, Canada</b>    | Soroush Shojai, Sita Gourishankar, Majid Sikosana                                                           |
| <b>St. Paul's Hospital</b>                                                 | <b>Vancouver, BC</b>           | John Gill, Jagbir Gill                                                                                      |
